# Supplementary material
Source: HighWire-hosted journal article supplement (https://ijgc.bmj.com/content/30/9/1308)
Supplement: inline-supplementary-material-3 [file inline-supplementary-material-3.pdf]

Supplement table 3. Multivariable analysis of the 1:1 matched group

|                                   | 5-year overall survival |              |        | 5-year disease-free survival |              |        |
|-----------------------------------|-------------------------|--------------|--------|------------------------------|--------------|--------|
|                                   | HR                      | 95%CI        | p      | HR                           | 95%CI        | p      |
| <b>Age</b>                        | 0.992                   | 0.969-1.014  | 0.459  | 0.992                        | 0.976-1.008  | 0.3308 |
| <b>Year of surgery</b>            |                         |              |        |                              |              |        |
| 2004-2009                         | 1 (Ref)                 |              |        | 1 (Ref)                      |              |        |
| 2010-2016                         | 5.472                   | 0.756-39.601 | 0.092  | 1.185                        | 0.551-2.549  | 0.665  |
| <b>Histopathology</b>             |                         |              |        |                              |              |        |
| Squamous cell carcinoma           | 1 (Ref)                 |              |        | 1 (Ref)                      |              |        |
| Adenocarcinoma                    | 1.571                   | 0.848-2.913  | 0.151  | 1.132                        | 0.708-1.811  | 0.604  |
| Adenosquamous carcinoma           | 1.378                   | 0.331-5.728  | 0.660  | 1.131                        | 0.358-3.527  | 0.834  |
| <b>FIGO stage</b>                 |                         |              |        |                              |              |        |
| IA1 (LVSI+) & IA2                 | 1 (Ref)                 |              |        | 1 (Ref)                      |              |        |
| IB1                               | 3.173                   | 0.762-13.218 | 0.113  | 4.049                        | 1.485-11.042 | 0.006  |
| <b>Stromal invasion</b>           |                         |              |        |                              |              |        |
| ≤1/2                              | 1 (Ref)                 |              |        | 1 (Ref)                      |              |        |
| >1/2                              | 4.968                   | 2.884-8.559  | <0.001 | 2.334                        | 1.593-3.420  | <0.001 |
| N/A                               | 1.940                   | 0.938-4.012  | 0.074  | 1.001                        | 0.584-1.715  | 0.998  |
| <b>Lymphovascular invasion</b>    |                         |              |        |                              |              |        |
| Negative                          | 1 (Ref)                 |              |        | 1 (Ref)                      |              |        |
| Positive                          | 2.035                   | 1.063-3.896  | 0.032  | 1.434                        | 0.881-2.334  | 0.147  |
| <b>Parametrial invasion</b>       |                         |              |        |                              |              |        |
| Negative                          | 1 (Ref)                 |              |        | 1 (Ref)                      |              |        |
| Positive                          | 0.464                   | 0.063-3.414  | 0.451  | 0.606                        | 0.148-2.485  | 0.486  |
| <b>Vaginal margin status</b>      |                         |              |        |                              |              |        |
| Negative                          | 1 (Ref)                 |              |        | 1 (Ref)                      |              |        |
| Positive                          | 3.153                   | 0.959-10.367 | 0.059  | 1.939                        | 0.695-5.413  | 0.206  |
| <b>Lymph nodes</b>                |                         |              |        |                              |              |        |
| Nonmetastasis                     | 1 (Ref)                 |              |        | 1 (Ref)                      |              |        |
| Metastasis                        | 4.065                   | 1.836-9.000  | 0.001  | 1.613                        | 0.964-2.699  | 0.068  |
| <b>Surgical approach</b>          |                         |              |        |                              |              |        |
| Abdominal radical hysterectomy    | 1 (Ref)                 |              |        | 1 (Ref)                      |              |        |
| Laparoscopic radical hysterectomy | 1.483                   | 0.987-2.228  | 0.058  | 1.605                        | 1.205-2.138  | 0.001  |
| <b>Adjuvant therapy</b>           |                         |              |        |                              |              |        |
| No                                | 1 (Ref)                 |              |        | 1 (Ref)                      |              |        |
| Yes                               | 0.292                   | 0.106-0.806  | 0.017  | 0.858                        | 0.432-1.706  | 0.662  |
