# Supplementary material
Source: HighWire-hosted journal article supplement (https://ijgc.bmj.com/content/30/9/1308)
Supplement: inline-supplementary-material-5 [file inline-supplementary-material-5.pdf]

Supplement table 5. Multivariable analysis tumor diameter 2-4 cm group

|                                   | 5-year overall survival |              |       | 5-year disease-free survival |              |        |
|-----------------------------------|-------------------------|--------------|-------|------------------------------|--------------|--------|
|                                   | HR                      | 95%CI        | p     | HR                           | 95%CI        | p      |
| <b>Age</b>                        | 0.988                   | 0.964-1.013  | 0.335 | 1.000                        | 0.982-1.018  | 0.990  |
| <b>Year of surgery</b>            |                         |              |       |                              |              |        |
| 2004-2009                         | 1 (Ref)                 |              |       | 1 (Ref)                      |              |        |
| 2010-2016                         | 2.205                   | 0.534-9.102  | 0.274 | 1.275                        | 0.517-3.141  | 0.598  |
| <b>Histopathology</b>             |                         |              |       |                              |              |        |
| Squamous cell carcinoma           | 1 (Ref)                 |              |       | 1 (Ref)                      |              |        |
| Adenocarcinoma                    | 1.699                   | 0.888-3.248  | 0.109 | 1.352                        | 0.810-2.257  | 0.248  |
| Adenosquamous carcinoma           | 2.032                   | 0.623-6.627  | 0.240 | 2.157                        | 0.871-5.338  | 0.096  |
| <b>FIGO stage</b>                 |                         |              |       |                              |              |        |
| IA1 (LVSI+) & IA2                 | 1 (Ref)                 |              |       | 1 (Ref)                      |              |        |
| IB1                               | -                       | -            | 0.955 | 3.650                        | 0.506-26.337 | 0.199  |
| <b>Stromal invasion</b>           |                         |              |       |                              |              |        |
| ≤1/2                              | 1 (Ref)                 |              |       | 1 (Ref)                      |              |        |
| >1/2                              | 2.811                   | 1.560-5.064  | 0.001 | 1.504                        | 0.987-2.292  | 0.058  |
| N/A                               | 1.681                   | 0.716-3.951  | 0.233 | 0.738                        | 0.351-1.551  | 0.423  |
| <b>Lymphovascular invasion</b>    |                         |              |       |                              |              |        |
| Negative                          | 1 (Ref)                 |              |       | 1 (Ref)                      |              |        |
| Positive                          | 1.718                   | 0.898-3.288  | 0.102 | 1.539                        | 0.930-2.546  | 0.094  |
| <b>Parametrial invasion</b>       |                         |              |       |                              |              |        |
| Negative                          | 1 (Ref)                 |              |       | 1 (Ref)                      |              |        |
| Positive                          | 0.843                   | 0.203-3.503  | 0.815 | 0.752                        | 0.236-2.392  | 0.629  |
| <b>Vaginal margin status</b>      |                         |              |       |                              |              |        |
| Negative                          | 1 (Ref)                 |              |       | 1 (Ref)                      |              |        |
| Positive                          | 3.926                   | 1.191-12.936 | 0.025 | 2.639                        | 0.941-7.401  | 0.065  |
| <b>Lymph nodes</b>                |                         |              |       |                              |              |        |
| Nonmetastasis                     | 1 (Ref)                 |              |       | 1 (Ref)                      |              |        |
| Metastasis                        | 3.191                   | 1.479-6.883  | 0.003 | 1.746                        | 1.025-2.974  | 0.040  |
| <b>Surgical approach</b>          |                         |              |       |                              |              |        |
| Abdominal radical hysterectomy    | 1 (Ref)                 |              |       | 1 (Ref)                      |              |        |
| Laparoscopic radical hysterectomy | 1.528                   | 0.984-2.373  | 0.059 | 1.807                        | 1.299-2.513  | <0.001 |
| <b>Adjuvant therapy</b>           |                         |              |       |                              |              |        |
| No                                | 1 (Ref)                 |              |       | 1 (Ref)                      |              |        |
| Yes                               | 0.499                   | 0.185-1.351  | 0.171 | 0.950                        | 0.465-1.941  | 0.888  |
